# Supplementary material
Source: ML conference proceedings conference paper supplement (https://openaccess.thecvf.com/content/CVPR_2020/html/Chen_AdderNet_Do_We_CVPR_2020_paper.html)
Supplement: Supplementary file 1 [file Chen_AdderNet_Do_We_CVPR_2020_supplemental.pdf]

# AdderNet: Do We Really Need Multiplications in Deep Learning? (Supplementary Material)

## Abstract

In the main body, we propose to replace the sign gradient with full-precision gradient in AdderNets. We then analyse the convergence of taking these two kinds of gradient. Moreover, we will discuss the relationship between the  $\ell_2$ -norm AdderNets and CNNs.

## 1. Convergence of Sign and Full-precision Gradient

AdderNets calculate the  $\ell_1$  distance between the filter and the input feature, which can be formulated as

$$Y(m, n, t) = - \sum_{i=0}^d \sum_{j=0}^d \sum_{k=0}^{c_{in}} |X(m+i, n+j, k) - F(i, j, k, t)|. \quad (1)$$

The partial derivative of  $Y$  with respect to the filters  $F$  is:

$$\frac{\partial Y(m, n, t)}{\partial F(i, j, k, t)} = \text{sgn}(X(m+i, n+j, k) - F(i, j, k, t)), \quad (2)$$

where  $\text{sgn}(\cdot)$  denotes the sign function and the value of the gradient can only take +1, 0, or -1. Since Eq. (2) almost never takes the direction of steepest descent and the direction only gets worse as dimensionality grows, we propose to use the full-precision gradient:

$$\frac{\partial Y(m, n, t)}{\partial F(i, j, k, t)} = X(m+i, n+j, k) - F(i, j, k, t). \quad (3)$$

**Proposition 1.** Denote an input patch as  $x \in \mathbb{R}^n$  and a filter as  $f \in \mathbb{R}^n$ , the optimization problem is:

$$\arg \min_f |x - f|. \quad (4)$$

Given a fixed learning rate  $\alpha$ , this problem basically cannot converge to the optimal value using sign grad (Eq. (2)) via gradient descent.

*Proof.* The optimization problem 4 can be rewritten as:

$$\arg \min_{f_1, \dots, f_n} \sum_{i=1}^n |x_i - f_i|, \quad (5)$$

where  $x = \{x_1, \dots, x_n\}$ ,  $f = \{f_1, \dots, f_n\}$ . The update of  $f_i$  using gradient descent is:

$$f_i^{j+1} = f_i^j - \alpha \text{sgn}(f_i^j - x_i), \quad (6)$$

where  $f_i^j$  denotes the  $f_i$  in  $j$ th iteration. Without loss of generality, we assume that  $f_i^0 < x_i$ . So we have:

$$f_i^{j+1} = f_i^j + \alpha = f_i^{j-1} + 2\alpha = \dots = f_i^0 + (j+1)\alpha, \quad (7)$$

when  $f_i^j < x_i$ . Denote  $t = \arg \max_j f_i^j < x_i$ , we have  $f_i^{t+1} \geq x_i$ . If  $f_i^{t+1} = f_i^0 + (t+1)\alpha = x_i$  (i.e.  $\frac{(x_i - f_i^0)}{\alpha} = t+1$ ),  $|f_i - x_i|$  can converge to the optimal value 0. However, if  $f_i^{t+1} > x_i$ , we have

$$f_i^{t+2} = f_i^{t+1} - \alpha \text{sgn}(f_i^{t+1} - x_i) = f_i^0 + (t+1)\alpha - \alpha = f_i^t \quad (8)$$

Similarly, we have  $f_i^{t+3} = f_i^{t+1}$ . Therefore, the inequality holds:

$$f_i^{t+2k} = f_i^t < x_i < f_i^{t+2k+1}, k \in \mathbb{N}^+ \quad (9)$$

which demonstrate that the  $f_i$  cannot converge and have an error of  $x_i - f_i^t$  or  $x_i - f_i^t$ . The  $f_i^j$  can converge to  $x_i$  if and only if  $\frac{(x_i - f_i^0)}{\alpha} \in \mathbb{Z}$ , which is a strict constraint since  $x_i, f_i, \alpha \in \mathbb{R}$ . Moreover, the  $f$  can converge to  $x$  if and only if  $\frac{(x_i - f_i^0)}{\alpha} \in \mathbb{Z}$  for each  $f_i \in f$ . The difficulty of converge increases when the number  $n$  grows. In neural networks, the dimension of filters is can be very large. Therefore, problem 4 basically cannot converge to its optimal value.  $\square$

The aim of filters is to find the most relevant part of input features, which meets the goal of Eq. (4). The  $\alpha$  (i.e. the learning rate of neural networks) can be seen as fixed when using multi-step learning rate, which is widely used in the training. According to the Proposition 1, if we use the sign gradient, the AdderNets will achieve a poor performance.

**Proposition 2.** For the optimization problem 4,  $f$  can converge to the optimal value using full-precision gradient (Eq. (3)) with a fixed learning rate  $\alpha$  via gradient descent when  $\alpha < 1$ .

*Proof.* The optimization problem 4 can be rewritten as:

$$\arg \min_{f_1, \dots, f_n} \sum_{i=1}^n |x_i - f_i|, \quad (10)$$

where  $x = \{x_1, \dots, x_n\}$ ,  $f = \{f_1, \dots, f_n\}$ . The update of  $f_i$  using gradient descent is:

$$f_i^{j+1} = f_i^j - \alpha(f_i^j - x_i), \quad (11)$$

where  $f_i^j$  denotes the  $f_i$  in  $j$ th iteration. If  $f_i^j < x_i$ , then we have the inequality:

$$f_i^{j+1} = f_i^j - \alpha(f_i^j - x_i) = (1 - \alpha)f_i^j + \alpha x_i < x_i, \quad (12)$$

and  $f_i^{j+1} < f_i^j$ . Without loss of generality, we assume that  $f_i^0 < x_i$ . Then  $f_i^j$  is monotone and bounded with respect to  $j$ , so the limit of  $f_i^j$  exists and  $\lim_{j \rightarrow +\infty} f_i^j \leq x_i$ . Assume that  $\lim_{j \rightarrow +\infty} f_i^j = l < x_i$ . For  $\epsilon = \alpha(x_i - l)$ , there exists  $k$  subject to  $l - f_i^k < \epsilon$ . Then we have:

$$\begin{aligned} f_i^{k+1} &= f_i^k + \alpha(x_i - f_i^k) \geq f_i^k + \alpha(x_i - l) \\ &> l - \epsilon + \alpha(x_i - l) = l, \end{aligned} \quad (13)$$

which is a contradiction. Therefore,  $\lim_{j \rightarrow +\infty} f_i^j \geq x_i$ . Finally, we have  $\lim_{j \rightarrow +\infty} f_i^j = x_i$ , *i.e.*  $f$  can converge to the optimal value.  $\square$

Therefore, by utilizing the full-precision gradient, the filters can be updated precisely.

## 2. Relationship Between $\ell_2$ -norm and Cross-correlation

In the main body, we propose to use a partial derivative in AdderNets, which is a clipped version of  $\ell_2$ -distance. Therefore, we further discuss using the  $\ell_2$ -distance in AdderNets instead of  $\ell_1$ -distance. By calculating  $\ell_2$  distance between the filter and the input feature, the filters in  $\ell_2$ -AdderNets can be reformulated as

$$Y(m, n, t) = - \sum_{i=0}^d \sum_{j=0}^d \sum_{k=0}^{c_{in}} [X(m+i, n+j, k) - F(i, j, k, t)]^2. \quad (14)$$

We also use the adaptive learning rate for the  $\ell_2$ -AdderNets, since the magnitude of the gradient w.r.t  $X$  in  $\ell_2$ -AdderNets would also be small. Table 1 shows the classification results on the ImageNet dataset. The  $\ell_2$ -AdderNet can achieve almost the same accuracy with CNN. In fact, the output of the

Table 1. Classification results on the ImageNet dataset using ResNet-18 model.

| Method          | #Mul. | #Add. | Top-1 Acc. | Top-5 Acc. |
|-----------------|-------|-------|------------|------------|
| $\ell_2$ -AddNN | 1.8G  | 3.6G  | 69.6%      | 89.0%      |
| $\ell_1$ -AddNN | 0     | 3.6G  | 66.8%      | 87.4%      |
| CNN             | 1.8G  | 1.8G  | 69.8%      | 89.1%      |

$\ell_2$ -AdderNets can be calculated as

$$\begin{aligned} Y_{\ell_2}(m, n, t) &= - \sum_{i=0}^d \sum_{j=0}^d \sum_{k=0}^{c_{in}} [X(m+i, n+j, k) - F(i, j, k, t)]^2 \\ &= \sum_{i=0}^d \sum_{j=0}^d \sum_{k=0}^{c_{in}} [2X(m+i, n+j, k) \times F(i, j, k, t) \\ &\quad - X(m+i, n+j, k)^2 - F(i, j, k, t)^2] \\ &= 2Y_{CNN}(m, n, t) - \sum_{i=0}^d \sum_{j=0}^d \sum_{k=0}^{c_{in}} [X(m+i, n+j, k)^2 \\ &\quad + F(i, j, k, t)^2]. \end{aligned} \quad (15)$$

$\sum_{i=0}^d \sum_{j=0}^d \sum_{k=0}^{c_{in}} F(i, j, k, t)^2$  is same for each channel (*i.e.* each fixed  $t$ ).  $\sum_{i=0}^d \sum_{j=0}^d \sum_{k=0}^{c_{in}} X(m+i, n+j, k)^2$  is the  $\ell_2$ -norm of each input patch. If this term is same for each patch, the output of  $\ell_2$ -AdderNet can be seen as a linear transformation of the output of CNN. Although this assumption may not always be valid, the result in Table 1 that the performance of  $\ell_2$ -AdderNet and CNN are similar indicates that  $\ell_2$ -distance and cross-correlation have same ability to extract the information from the inputs.
